# Supplementary material
Source: PubMed Central journal article supplement (PMC3747803)

SUPPLEMENTARY DATA

FIG. S1. STRUCTURE analysis of Tunisian and western wild cardoon, together with leafy cardoon and artichoke at  $K = 3$ .

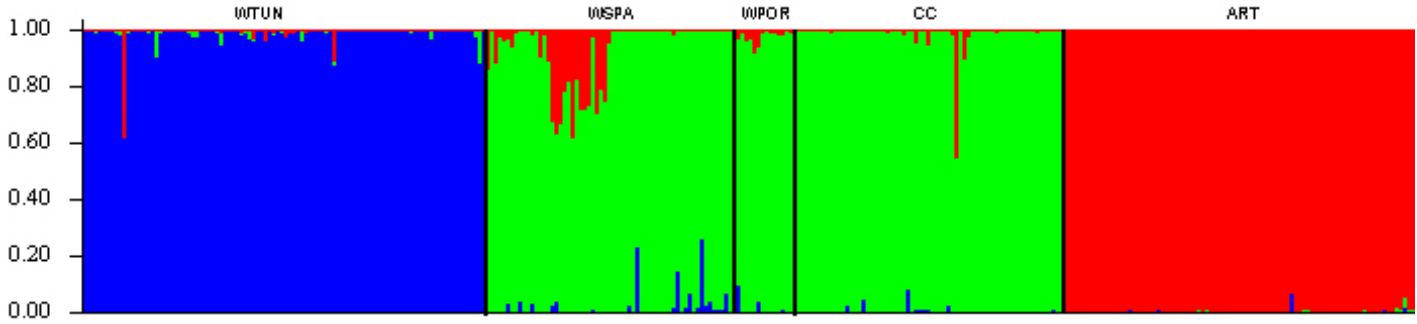

FIG. S2: STRUCTURE plot for cultivated cardoon at  $K = 2$ .

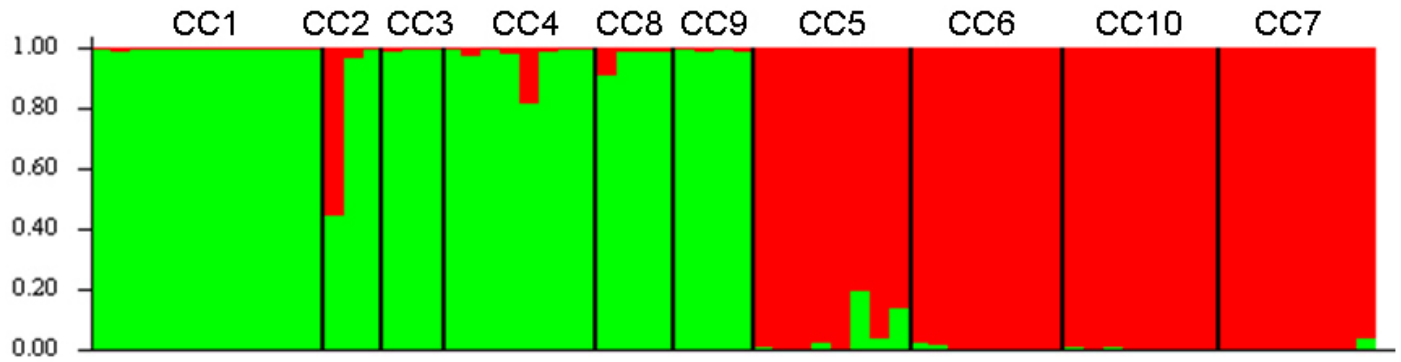

FIG. S3: STRUCTURE analysis on artichoke samples at  $K = 2$  and  $K = 4$ .

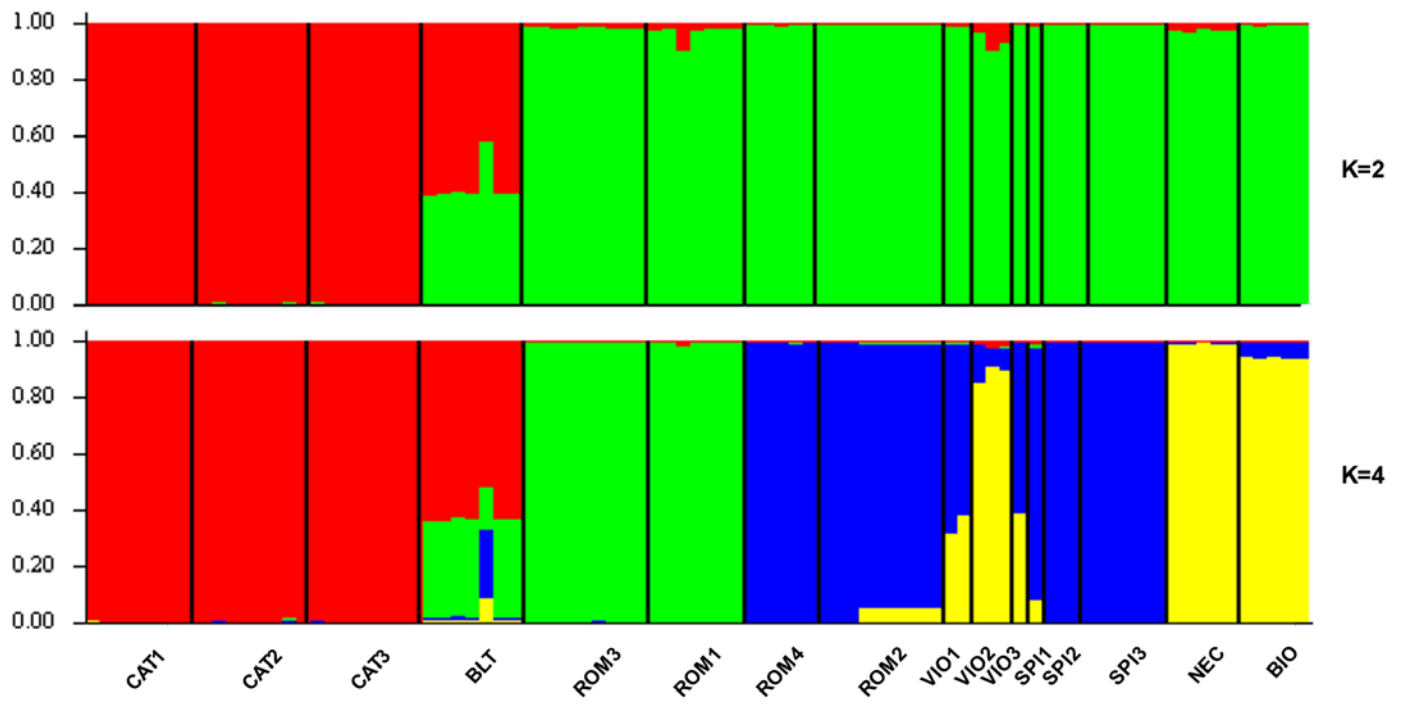

Supplement: supp_mct150_mct150supp.pdf [file supp_mct150_mct150supp.pdf]
